# Supplementary material for: Engineered lentivirus-derived nanoparticles (LVNPs) for delivery of CRISPR/Cas ribonucleoprotein complexes supporting base editing, prime editing and in vivo gene modification
Source: PubMed Central journal article supplement — Nucleic Acids Res. 2023 Sep 8;51(18):10059–74. doi: 10.1093/nar/gkad676 (PMC10570023; doi:10.1093/nar/gkad676), 2023-09-08
Supplement: gkad676_supplemental_file.pdf [file gkad676_supplemental_file.pdf]

## Supplementary material

### Engineered lentivirus-derived nanoparticles (LVNPs) for delivery of CRISPR/Cas ribonucleoprotein complexes supporting base editing, prime editing and *in vivo* gene modification

Jakob Haldrup<sup>1</sup>, Sofie Andersen<sup>1,2</sup>, Alexander Rafael LaVilla Labial<sup>1</sup>, Jonas Holst Wolff<sup>1</sup>, Frederik Plum Frandsen<sup>1</sup>, Thomas Wisbech Skov<sup>1</sup>, Anne Bruun Rovsing<sup>1</sup>, Ian Nielsen<sup>1</sup>, Thomas Stax Jakobsen<sup>1+3</sup>, Anne Louise Askou<sup>1,3</sup>, Martin K. Thomsen<sup>1</sup>, Thomas J. Corydon<sup>1,3</sup>, Emil Aagaard Thomsen<sup>1</sup>, and Jacob Giehm Mikkelsen<sup>1</sup>.

<sup>1</sup>Department of Biomedicine, Aarhus University, Aarhus C, Denmark

<sup>2</sup>Current address: RNA and Gene Therapies, Research & Early development, Novo Nordisk A/S, Måløv, Denmark

<sup>3</sup>Department of Ophthalmology, Aarhus University Hospital, Aarhus N, Denmark

## Supplementary Methods

### Cloning of GagPol-IntSpCas9

For construction of LVNP1.0, two fragments encoding (i) FLAG-tagged SpCas9 was PCR amplified from pX330 (Addgene #42230) and, (ii) a C-terminal GagPol fragment from pMDLg/p-PCS-hyPBase(1) and inserted into a BspTI/Kpn2I (Thermo Fisher Scientific) digested pMDLg/p-PCS-hyPBase(1) using NEBuilder® HiFi DNA Assembly Master Mix (New England Biolabs). Primers are listed in Supplementary Table 6.

### Cloning of GagPol-MatSpCas9

For construction of LVNP2.0, FLAG-tagged SpCas9 was PCR amplified from pX330 (Addgene #42230) and inserted into BshTI/Kpn2I (Thermo Fisher Scientific) digested pGFP-PH-GagPol-D64V(2) using NEBuilder® HiFi DNA Assembly Master Mix (New England Biolabs). Primers are listed in Supplementary Table 6.

### Cloning of GagPro-SpCas9/BE/PE

For construction of pGagPro-POI (protein of interest), three fragments were inserted into EcoRI (Thermo Fisher Scientific) digested pMD.2G using NEBuilder® HiFi DNA Assembly Master Mix (New England Biolabs). Fragment 1 (TWIST Bioscience) encode a MCS and the N-terminal part of Gag. Fragment 2 was PCR amplified from pGagPol-MatSpCas9 and encode the C-terminal fragment of Gag. Fragment 3 (TWIST Bioscience) encodes the HIV-1 protease, a protease cleavage site (SQNYPIVQ), 3xFLAG, cMyc/SV40 NLS, and a XbaI restriction site for insertion of POI. SpCas9, ABE8e, or PE2 was PCR amplified by Platinum SuperFi II DNA Polymerase (Thermo Fisher Scientific) from pLentiCRISPRv2-eGFP (Addgene #82416) and pABE8e (Addgene #138489), respectively, and inserted into XbaI (Thermo Fisher Scientific) linearized pGagPro-XbaI using NEBuilder® HiFi DNA Assembly Master Mix (New England Biolabs). For generation of GagProPEmax and GagPro-PEmini, two fragments encoding the C- and N-terminal parts of Pemax were amplified from pCMV-Pemax (Addgene #174820) or

pLentiPEmini-eGFP-WPRE and a fragment encoding the *rev*-responsive element (RRE) were amplified from pMDLg-RRE-D64V. The three fragments were then assembled into a XbaI-digested pMD.2G-MCS-GagPro-FLAG-NoNLS-XbaI backbone using NEBuilder. Primers are listed in Supplementary Table 6.

#### **pCCL/PGK-d2eGFP-IRES-puro**

A third-generation LV vector encoding pCCL/PGK-d2eGFP-IRES-puro was constructed by digestion of pCCL/PGK-MCS-IRES-puro with BamHI (Thermo Fisher Scientific) following insertion of the d2eGFP fragment amplified from pT2/UASTK-d2eGFP-SV40-neo and assembled by NEBuilder® HiFi DNA Assembly Master Mix (New England Biolabs). Primers are listed in Supplementary Table 6.

## Supplementary Figures

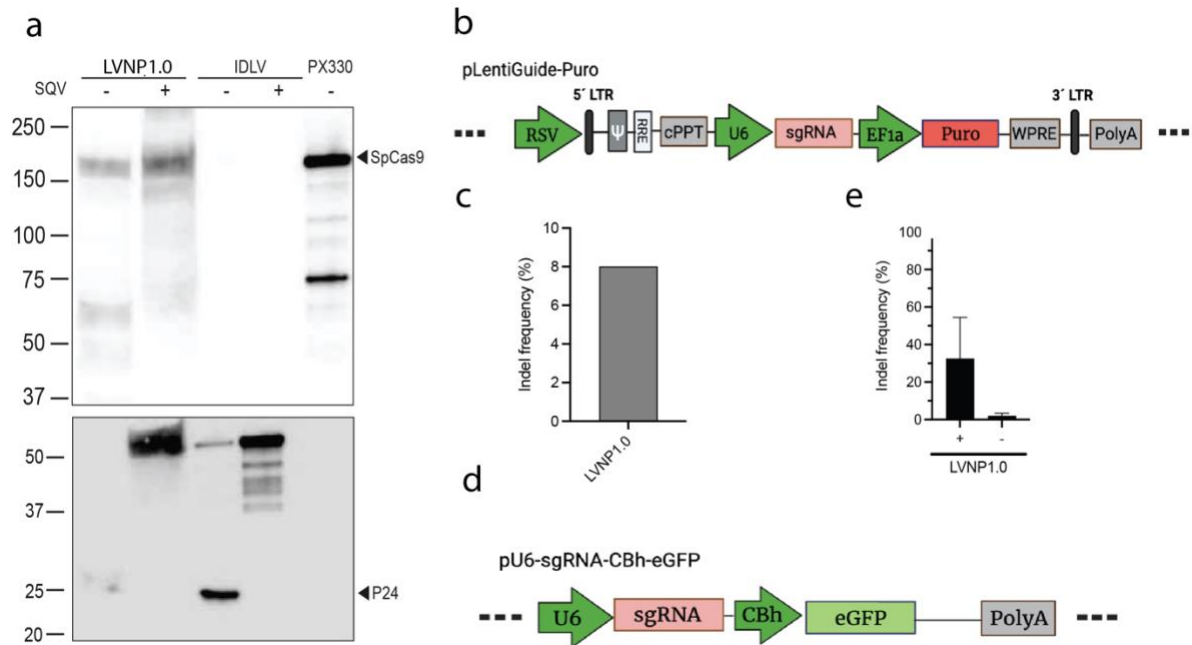

**Supplementary Figure S1.** Characterization of LVNP1.0. (a) Western blot analysis of FLAG-tagged SpCas9 (FLAG antibody) and p24 loading control of purified LVNP1.0 (90 ng p24) and IDLV (90 ng p24) in the presence or absence of the HIV-1 protease inhibitor saquinavir (SQV). (b) Schematic of the LentiGuide-Puro plasmid. (c) Indel rates in the *AFF1* locus following administration of 300 ng p24 LVNP1 in a 6-well plate. (d) Schematic of the U6-sgRNA-Cbh-eGFP plasmid. (e) Indel rates in the *AFF1* locus following administration of 90 ng p24 LVNP1.0 (+/- VSV-G) in 24 well-plates.

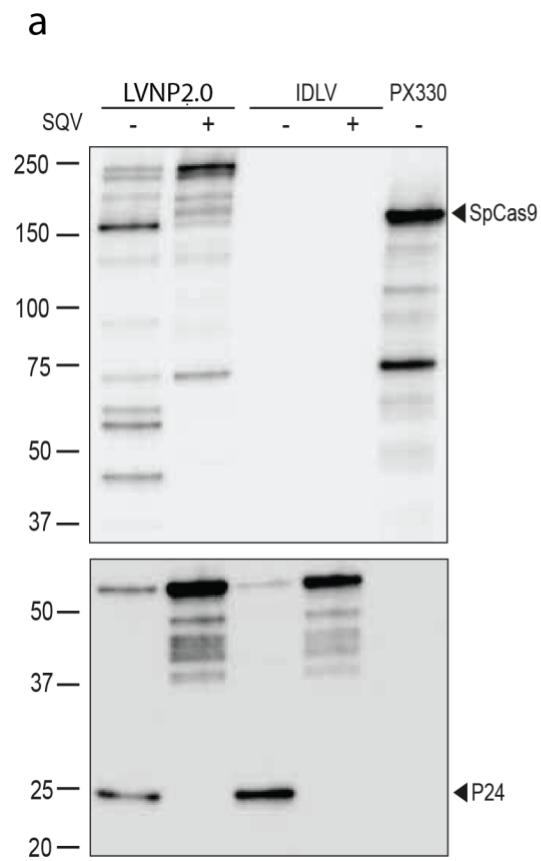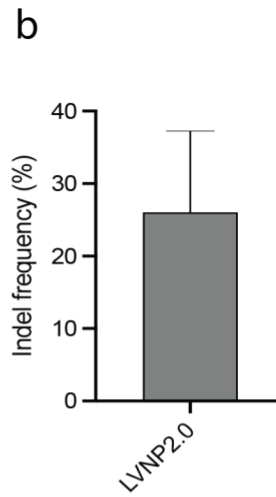

**Supplementary Figure S2.** Characterization of LVNPs2.0. (a) Western blot analysis of FLAG-tagged SpCas9 (FLAG antibody) and p24 loading control of purified LVNP2.0 (90 ng p24) and IDLV (90 ng p24) in the presence or absence of the HIV-1 protease inhibitor saquinavir (SQV). (b) Indel rates in the *AFF1* locus following administration of 300 ng p24 LVNP2.0 in a 6-well plate. Data is presented as mean of  $\pm$ SD of triplicates.

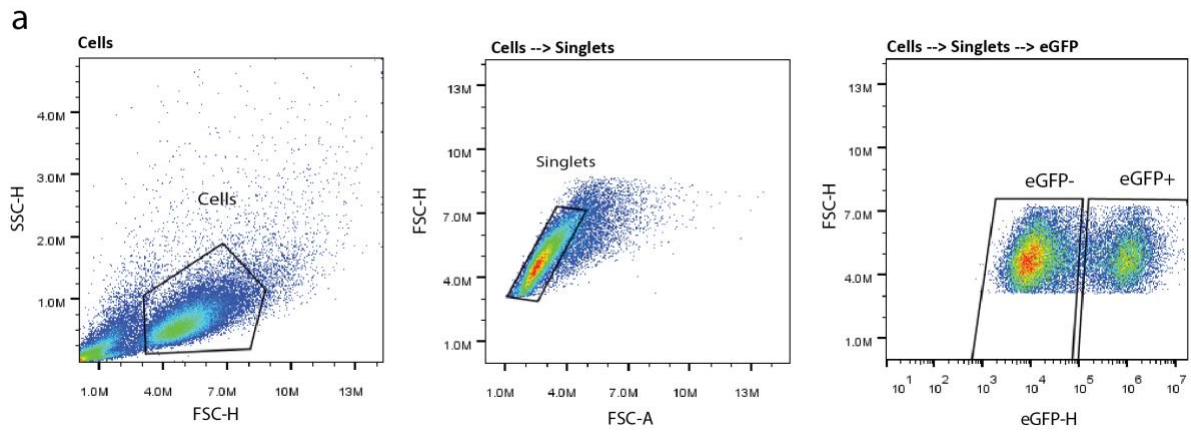

**Supplementary Figure S3.** Flow cytometry. (a) Representative gating strategy for quantification of eGFP-positive cells following transduction of LVNP2.2 loaded with a sgRNA and a vector encoding the eGFP transgene (15 ng p24). All experiments were performed in triplicates.

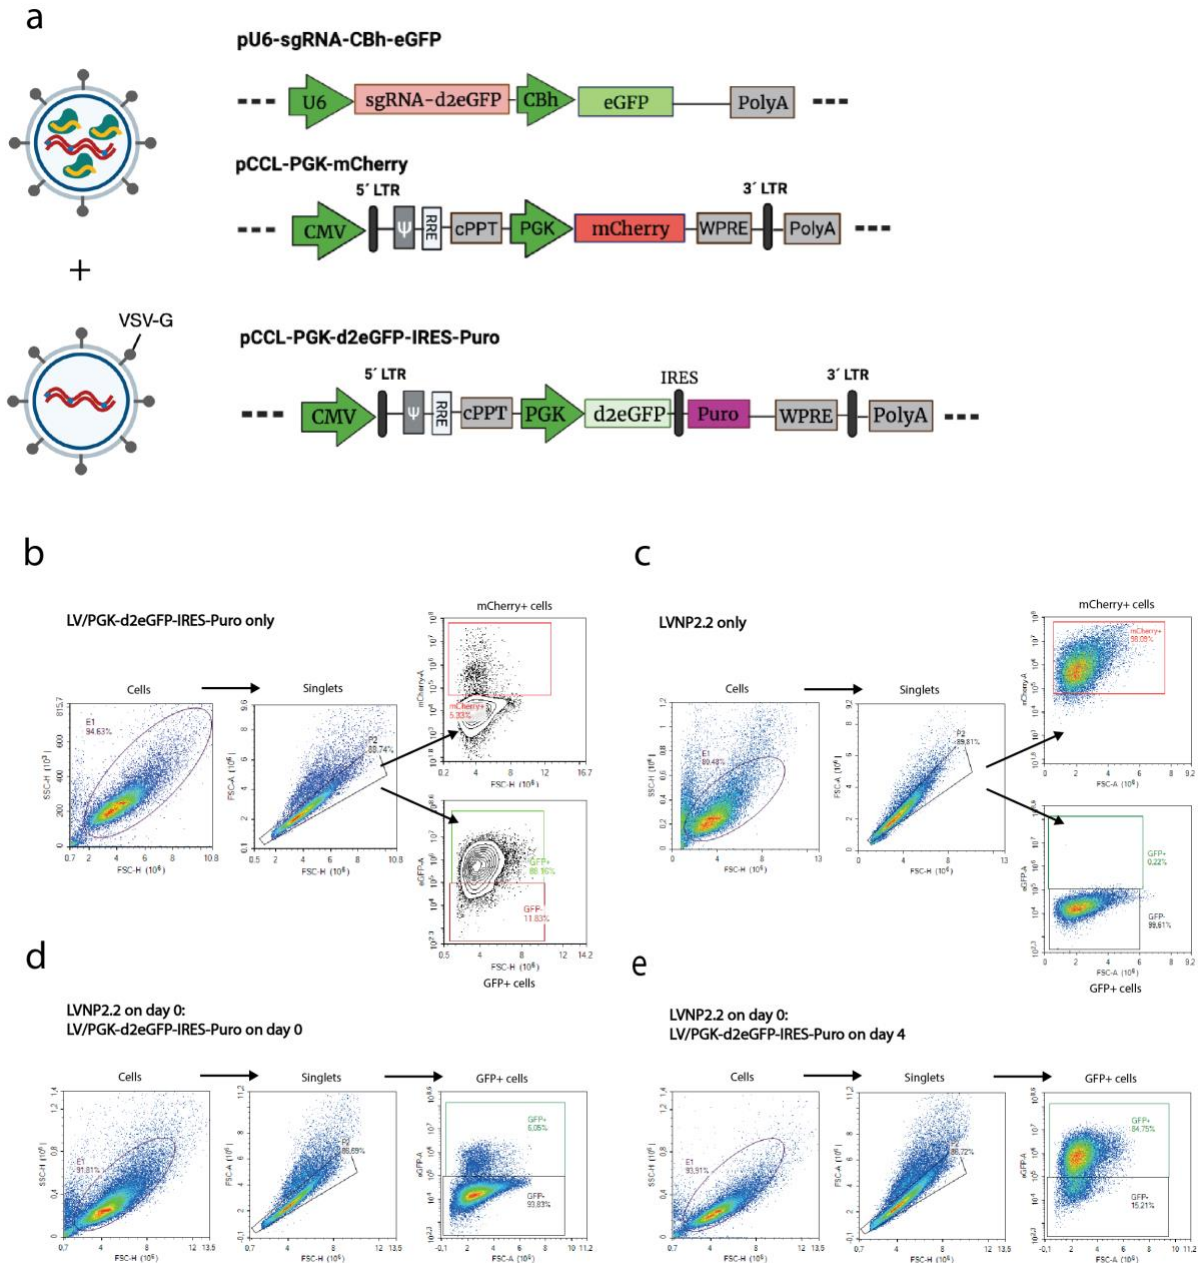

**Supplementary Figure S4.** (a) Upper: Schematic of the U6-sgRNA-CBh-eGFP plasmid, Middle: Schematic of pCCL-PGK-mCherry plasmid that was used to produce LVNP2.2 loaded with a sgRNA targeting d2eGFP and a mCherry transgene. Lower: Schematic of the lentiviral pCCL-PGK-d2eGFP-IRES-Puro backbone. (b) Representative gating strategy to quantify the number of eGFP-positive cells following LV/PGK-d2eGFP-IRES-Puro transduction (90 ng p24). (c) Representative gating strategy to quantify the number of mCherry-positive cells following transduction of LVNP2.2 loaded with a sgRNA targeting d2eGFP and a mCherry-encoding vector genome. (d) Representative gating strategy for quantification of double positive mCherry/eGFP cells following co-transduction of LV/PGK-d2eGFP-IRES Puro and LVNP2.2 loaded with sgRNA targeting d2eGFP and a mCherry vector genome at day 0. (e) Same as (d) after 4 days. All experiments were performed in triplicates.

a

|              |                       |            |                                |
|--------------|-----------------------|------------|--------------------------------|
|              |                       | <b>PAM</b> |                                |
| On-target    | AGCAGCAGCGGGCGGCAACAG | GGG        | <b>chr4:81612-81635</b>        |
| Off-target 1 | AGCAGCAGCAGCAAGCAACAG | GGG        | <b>chr7:73927327-73927350</b>  |
| Off-target 2 | AGCAGCAGCAGCAAGCAACAG | GAG        | <b>chr15:88958219-88958242</b> |
| Off-target 3 | AGCAGCAGCAACGGCAACAG  | CAG        | <b>chr19:24013247-24013270</b> |
| Off-target 4 | AGCAGCAGCAGCAAGCAACAG | CGG        | <b>chr10:37138620-37138643</b> |

b

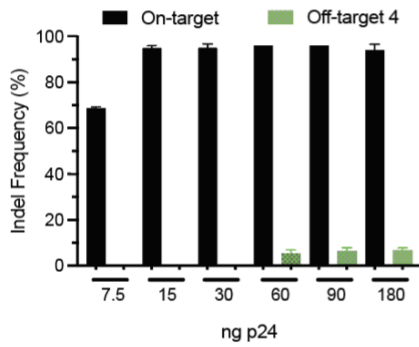

c

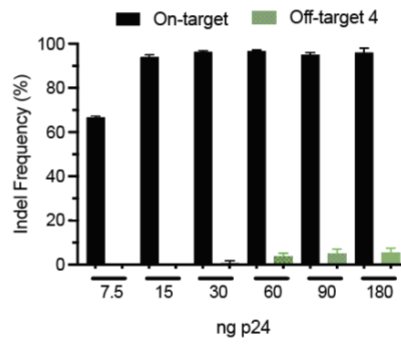

d

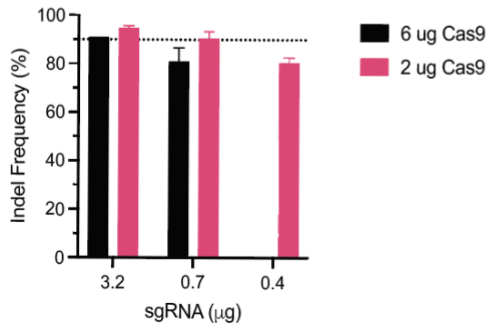

e

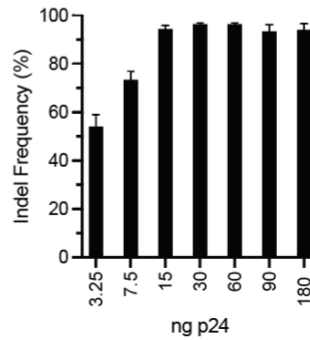

**Supplementary Figure S5.** Transient LVNP delivery. (a) The genomic sequences (murine) and genomic coordinates (murine) of the tested Pcsk9 off-target sites (b) AML12 hepatocytes were transduced with increasing quantity of LVNP2.2 and the level of Pcsk9 disruption and a well-characterized off-target locus (Off-target 1) after 7, or (c) 14 days. (d) AML12 hepatocytes were nucleofected with decreasing amounts of RNP and synthetic sgRNA to non-saturating conditions, and (e) following LVNP2.2 transduction. Indel frequencies were evaluated in the Pcsk9 locus 3-days post administration. All experiments were performed in triplicates.



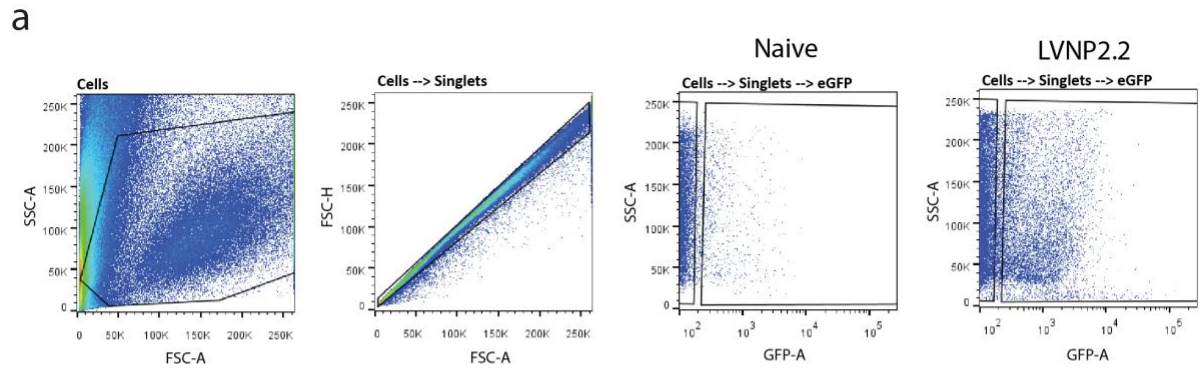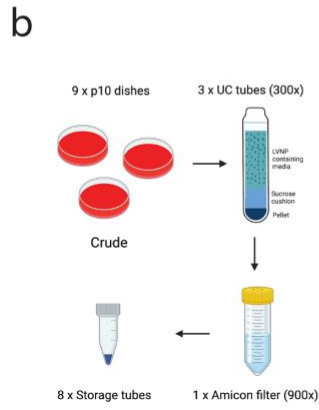

**Supplementary Figure S6.** *In vivo* studies. (a) Representative gating strategy to sort eGFP-positive and eGFP-negative RPE cells from Naïve or LVNP2.2-treated eyes. (b) Schematics of LVNP3.0 production including an additional purification step by Amicon filtrat

a

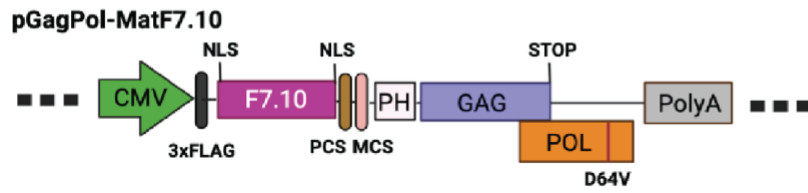

b

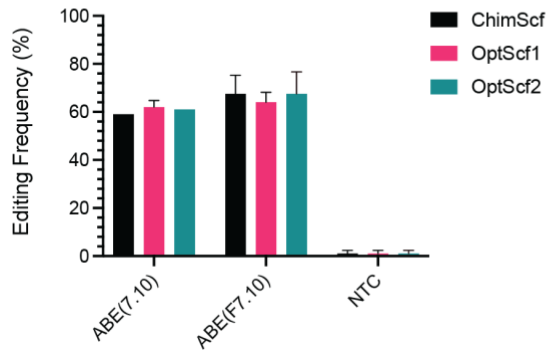

c

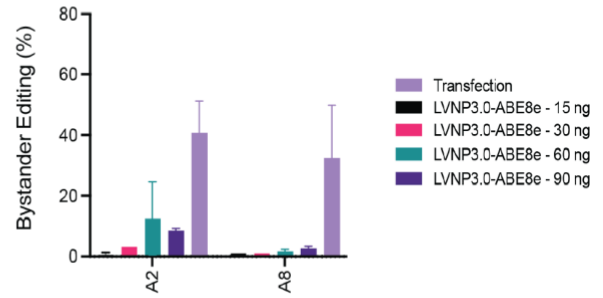

**Supplementary Figure S7.** Base Editing of 'Site 2'. (a) of Schematics of pGagPol-MatF7.10 base editor composed of FLAG-Tagged 7.10 (F7.10) fused to the N-terminus of Gag harboring an intervening phospholipase C- $\delta$ 1 pleckstrin homology (PH) domain. (b) Editing frequencies of the base editors ABE7.10 or 3xFLAG-tagged ABE7.10 (ABE(F7.10)) for ChimScf, OptScf1, and OptScf2 in 'Site 2' in HEK293T 3 days after transfection. (c) The level of bystander editing of plasmid DNA transfection and LVNP-3.0-ABE8e in a dose-escalation manner. Data are presented as +/- SD of at least duplicates.

a

PEmax-Rep1

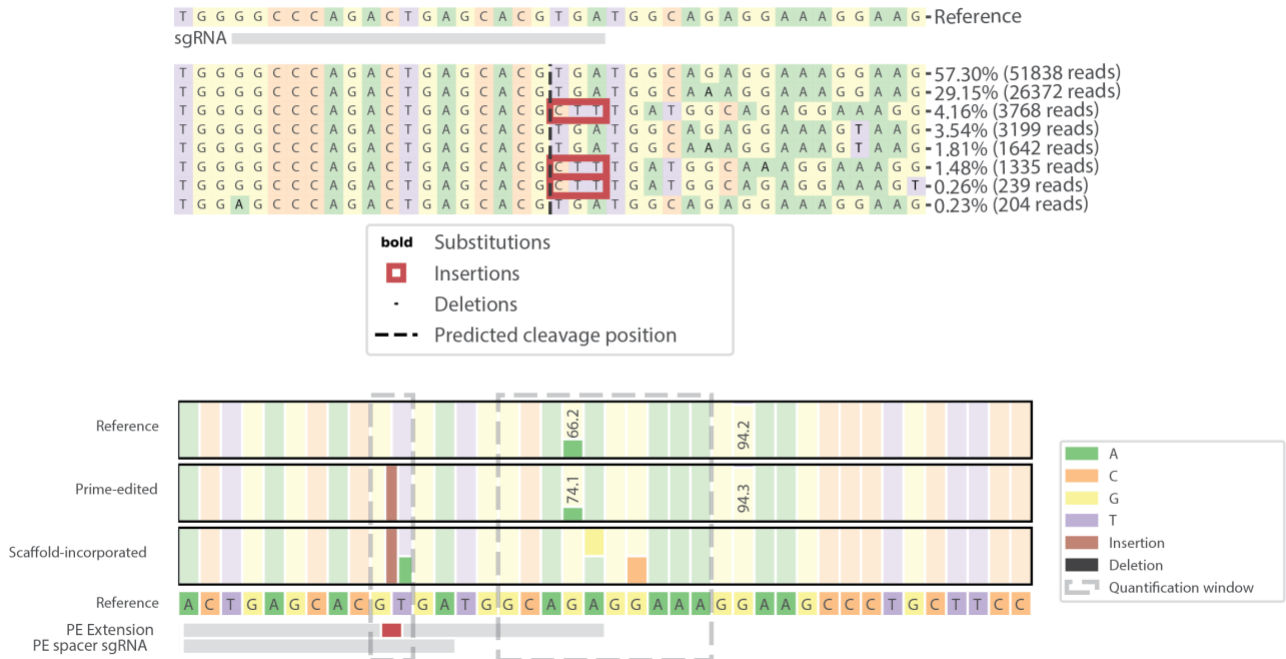

b

PEmax-Rep2

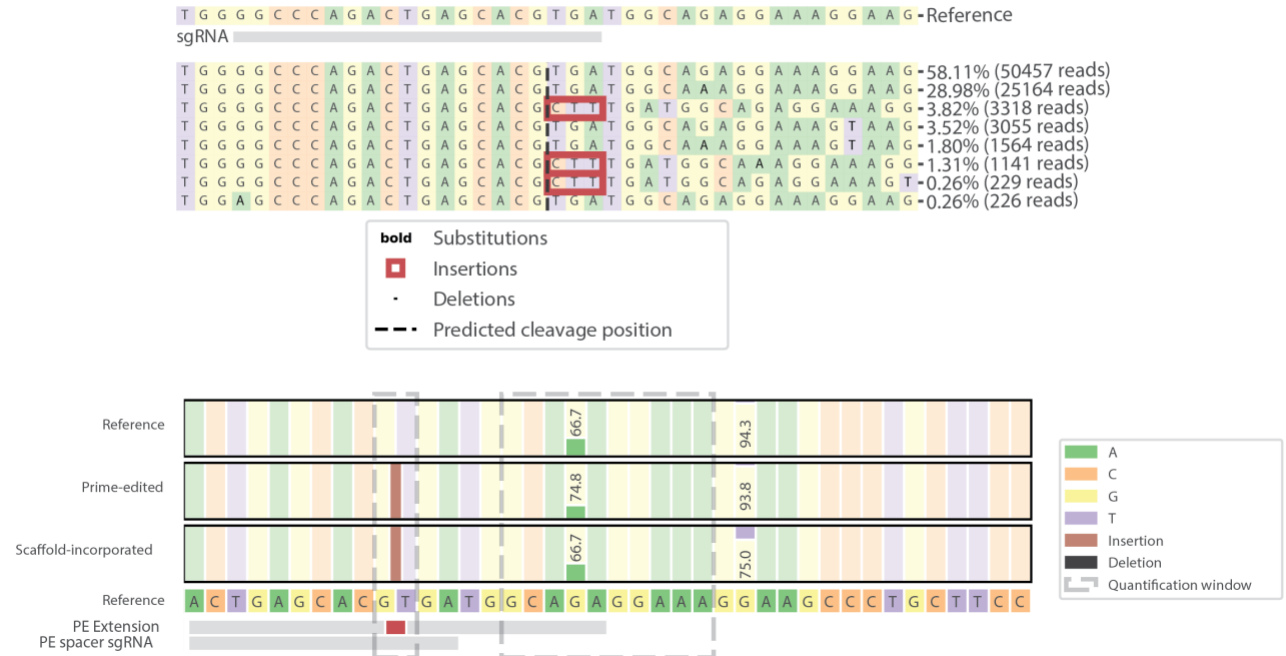

**Supplementary Figure S8.** Quantification of desired/undesired prime editing events following LVNP delivery of PEmax. (a) The percentage of reads aligned to the wild-type HEK3 reference sequence or the CTT insertion (red box) in the HEK3 locus (upper). Dashed lines highlights the quantification window of intended/unintended prime editing and unwanted scaffold incorporation. (b) same as (a) for replicate two.

**a** PEmax $\Delta$ RH-Rep1

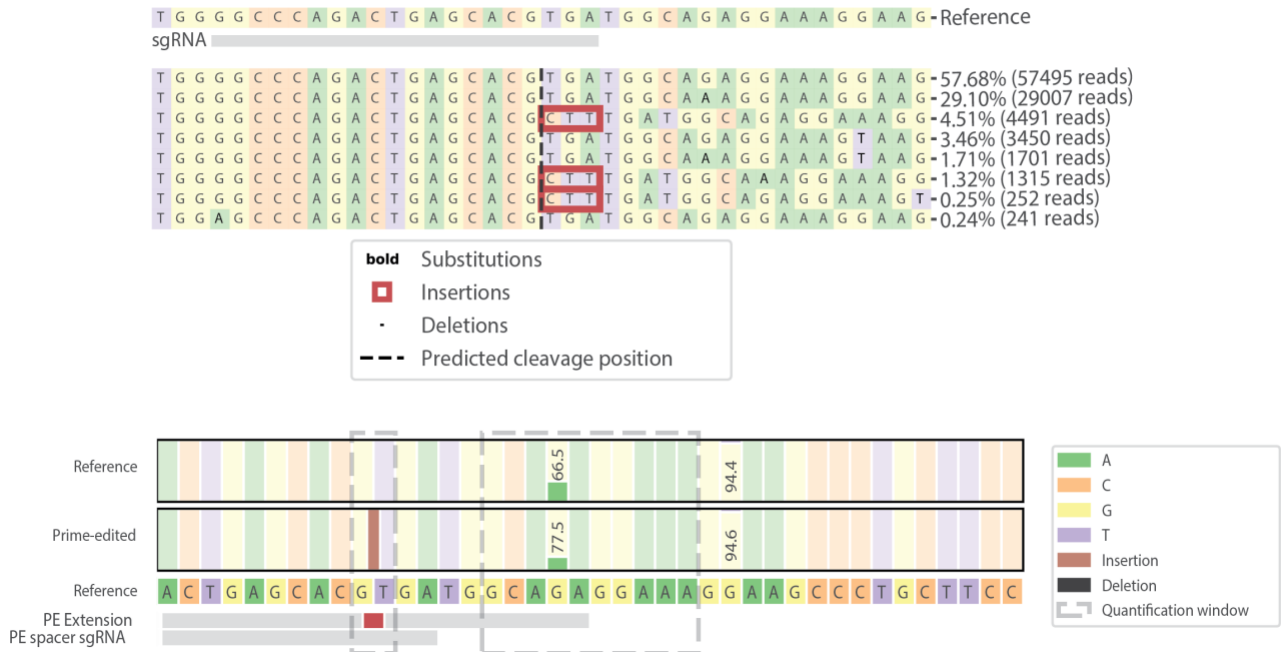

**b** PEmax $\Delta$ RH-Rep2

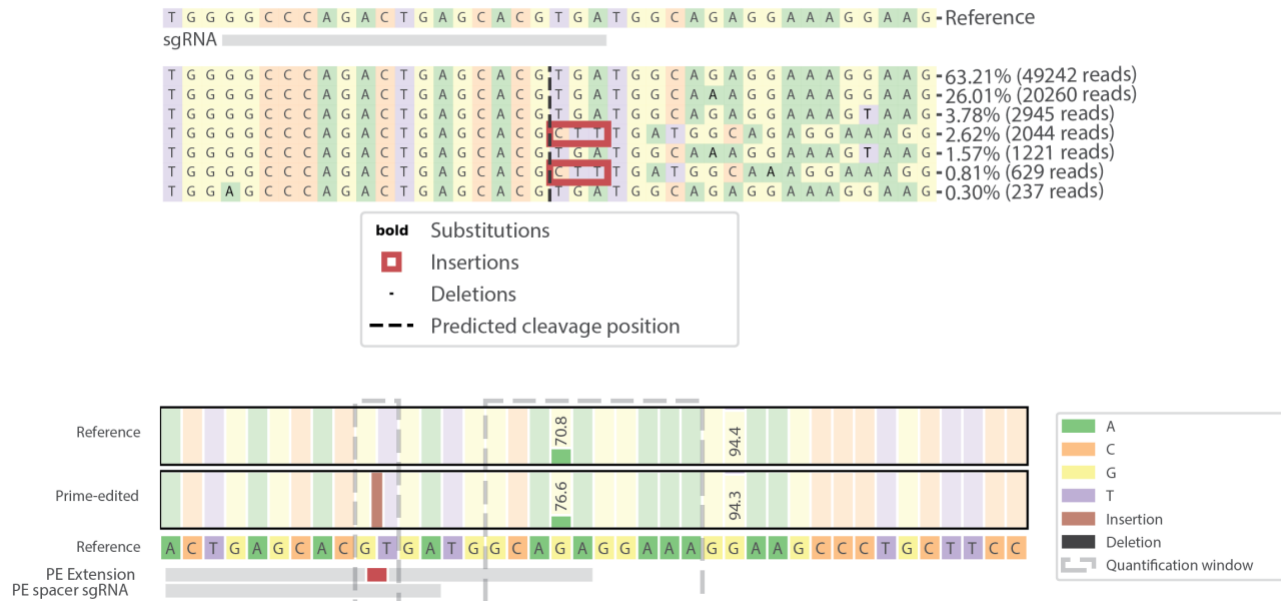

**Supplementary Figure S9.** Quantification of desired/undesired prime editing events following LVNP delivery of PEmax. (a) The percentage of reads aligned to the wild-type HEK3 reference sequence or the CTT insertion (red box) in the HEK3 locus (upper). Dashed lines highlights the quantification window of intended/unintended prime editing and unwanted scaffold incorporation. (b) same as (a) for replicate two.

**Supplementary Table S1.** The production parameters of the indicated LVNP configuration. Each value represents the required amount of plasmid ( $\mu\text{g}$ ) per p10 dish for each configuration.

|                                   | LVNP1.0 | LVNP2.0 | LVNP2.1 | LVNP2.2 | LVNP3.0-SpCas9 | LVNP3.0-BE | LVNP3.0-PE | eVLP  |
|-----------------------------------|---------|---------|---------|---------|----------------|------------|------------|-------|
| <i>pRSV-REV</i>                   | 3.00    | 3.00    | 3.00    | 3.00    | 3.00           | 3.00       | 3.00       | -     |
| <i>pLVNP backbone*</i>            | 13.00   | 8.70    | 8.70    | 3.90    | 3.90           | 9.80       | 3.90       | -     |
| <i>pMDlg/p-RRE-D64V</i>           | -       | 4.30    | 4.30    | 9.10    | 9.10           | 3.30       | 9.10       | -     |
| <i>pMD.2G (VSV-G)</i>             | 3.75    | 3.75    | 3.75    | 3.75    | 3.75           | 3.75       | 3.75       | 1.28  |
| <i>pU6-sgRNA/pegRNA-Cbh-eGFP</i>  | 13.00   | 13.00   | 13.00   | 5.20    | 5.20           | 5.20       | 5.20       | 14.08 |
| <i>pCCL/PGK-eGFP or mCherry**</i> | -       | -       | -       | 7.80    | 7.80           | 7.80       | 7.80       | -     |
| <i>pMMLV-Gag-3xNES-Cas9</i>       | -       | -       | -       | -       | -              | -          | -          | 3.60  |
| <i>pMMLV-Gag-Pro-Pol</i>          | -       | -       | -       | -       | -              | -          | -          | 10.80 |

\*pGagPol-IntSpCas9; pGagPol-MatSpCas9/BE; pGagPro-SpCas9/BE/PE

\*\*Titer experiments were performed with 13  $\mu\text{g}$  pCCL-PGK-eGFP and 0  $\mu\text{g}$  sgRNA

**Supplementary Table S2.** Oligonucleotides of sgRNA/epgRNA including cloning sites.

| sgRNA/epgRNA                      | Forward (5' - 3')                                                                      | Reverse (5' - 3')                                                                         |
|-----------------------------------|----------------------------------------------------------------------------------------|-------------------------------------------------------------------------------------------|
| sgRNA_Pcsk9                       | caccgagcagcagcgcgcaacag                                                                | aaacctgttccgcccgtgctctc                                                                   |
| sgRNA_AFF1                        | caccgccttcagctcagtgacagtg                                                              | aaacctgtcactgagctgaaggc                                                                   |
| sgRNA_Vegfa                       | caccgctcctggaagatgtccacca                                                              | aaactggtggacatctccaggagc                                                                  |
| sgRNA_Fah                         | caccggatggtcctcatgaacgac                                                               | aaactgcttcatgaggaccatcc                                                                   |
| sgRNA_d2eGFP                      | caccgggagaggagctgttcaccg                                                               | aaaccggtgaacagctcctgcc                                                                    |
| sgRNA_SERPING1                    | caccgttgcaagacagaggcgaa                                                                | aaactcgctctgtctgcaaac                                                                     |
| sgRNA_Pcsk9- Synthetic            | agcagcagcgcgcaacag                                                                     | n/a                                                                                       |
| sgRNA_Site2                       | caccggagtataggcatagactgc                                                               | Aaacgcagtctatgcctcactcc                                                                   |
| epgRNA-HEK3 CTTins<br>(spacer)    | caccggcccagactgagcacgtga                                                               | aaactcacgtgctcagctgggcc                                                                   |
| epgRNA-HEK3 CTTins<br>(extension) | gtgctctgcatcaaaagcgtgctcagctgtgtaataac                                                 | cgcggtatttaacagactgagcacgctttagggcaga                                                     |
| ChimScf                           | agagctagaaatagcaagttaaaataaggctagtccttatcaactgaaaaagtgaccga<br>gtcgggtc                | gcaccgactcggtgccacttttcaagttgataacggactagcctattttaactgctatttctagctct                      |
| OptScf1                           | agagctatgctggaacagcatagcaagttaaaataaggctagtccttatcaactgaaaaag<br>tgaccagagtcg          | gcaccgactcggtgccacttttcaagttgataacggactagcctatttaactgctatgctgtttccagcata<br>g             |
| OptScf2                           | agagctatgctggaacagcatagcaagttaaaataaggctagtccttatcaacttgctgga<br>aacagcaagtgaccagagtcg | gcaccgactcggtgccactttgctgtttccagcaaaagttgataacggactagcctatttaactgctatgctgt<br>ttccagcatag |

**Supplementary Table S3.** Oligonucleotides for PCR and Sanger sequencing

| PCR/Sequencing oligoes | Forward (5' - 3')             | Reverse (5' - 3')            |
|------------------------|-------------------------------|------------------------------|
| PCR_Pcsk9              | gaggccgaaactgatcctt           | cttagagaccaccagacggc         |
| PCR_Vegfa_Nested-R1    | gagcccaggagcaaaggtca          | ggttcctggtgtgcttagtgga       |
| PCR_Vegfa_Nested-R2-P1 | aaaggtcacgaaagcagatggtcaa     | gtgtatatacatagctgccgg        |
| PCR_Vegfa_Nested-R2-P2 | agagcttcggcagggaagtaca        | tatttgatgagtggtgtggcct       |
| PCR_Vegfa_Nested-R2-P3 | ttgtaccactgtcctctgc           | gtggagctgtaaggagtggt         |
| PCR_SERPING1           | ctcatctgccgactgtcagaaattactct | gattggtgactctatggaggtgccaaca |
| PCR_Site2              | atgtaaagtggaagggaacaa         | tgacaaggtaaaggaaaggaggc      |
| PCR_Vegfa (transgene)  | aaaggtcacgaaagcagatggtcaa     | gtgtatatacatagctgccgg        |
| PCR_Fah                | gttgccaaattggctcacttac        | ccacaccacagagtcagaa          |
| PCR_HEK3               | atgtgggctcctagaaagg           | cccagccaactgtcaacc           |
| ChIP_Pcsk9             | ggctcccgttctctctct            | ctcgggaaggacatggacg          |
| ChIP_Reference         | ctgctctgactggtaaatgaa         | atthtgtgctgataacctct         |
| Vegfa_OT1              | ggagactgtttggcctctgt          | aatagtcctctgtctgctg          |
| Vegfa_OT2              | gctggtccctgtggattaca          | tgagagactcggggacaga          |
| Pcsk9_OT               | gtacaaggctccacaggtca          | ctcctgctctaggagaggtgt        |

**Supplementary Table S4.** Oligonucleotides and probes for ddPCR

| ddPCR oligoes              | Sequence (5' - 3')                   |
|----------------------------|--------------------------------------|
| ddPCR_AFF1.FOR             | ccttcagctcagtgacagtgg                |
| ddPCR_Pcsk9.FOR            | cagcagcggcggcaacaggt                 |
| ddPCR_Vegfa.FOR            | cctggaagatgtccaccagt                 |
| ddPCR_SERPING1.FOR         | ttgcaagacagaggcgaagt                 |
| ddPCR_sgRNA(universal).BOT | ccgactcgggtccacttt                   |
| ddPCR_Probe_universal      | FAM-aaataaggctagtcggttatcaactt-BHQ-1 |

**Supplementary Table S5.** Oligonucleotides for NGS

| NGS oligonucleotides | Sequence (5' - 3')                                       |
|----------------------|----------------------------------------------------------|
| HEK3 CTT NGS.FOR     | acactcttccctacacgacgctcttccgatctgcaattagtctatttctgtgcaag |
| HEK3 CTT NGS.REV     | gtgactggagttcagacgtgtgctcttccgatctgcaaccagatcccgggtc     |
| 15                   | atgatacggcgaccaccgagatctacacnnnnnnnactcttccctacacgac     |
| 17                   | caagcagaagcggcatacagatnnnnnnnngtactggagttcagacgtgt       |

**Supplementary Table S6.** oligonucleotides used for NEBuilder of indicated plasmids

| NEBuilder        | Sequence (5' - 3')                                        | Reverse (5' - 3')                                                    |
|------------------|-----------------------------------------------------------|----------------------------------------------------------------------|
| GagPol-IntSpCas9 | gagtgctggccgagccatgagcgactataaggaccacgacg                 | cctgcggccgctccggaattccatgtgtcacttttcttttgcctg                        |
| GagPol-MatSpCas9 | gatccgctagcgtaccggtaccaccatggactataaggac                  | ctcgagatctgagtcgggtctgcacaatcggatagttctggctaaagttcttttcttttgcctggccg |
| GagPro-Frag1     | gccatcactttggcaaagcacgtgagatctgctcagatctcgagctcaagctt     | agtacagggtggccacgggtgtgtacaggctcctcagctcct                           |
| GagPro-Frag2     | gcagaccggcagcagagctgaggagcctgtacaacccgtggccaccctg         | cttctggtgggctgtggctctggtctgctgaagaaa                                 |
| GagPro-Frag3     | ccaccatttctcagagcagaccagagccaacagccccaccagaa              | tgataggcagcctgcactgtggggtgtctagacttccgcttcttcttgggc                  |
| GagPro-SpCas9    | ggggtagcccaaagaagaagcggaaagtctgacaagaagtacagcatcggcctggac | taggcagcctgcactgtggggtgttacttttcttttgcctggccg                        |
| GagPro-ABE8e     | gtagcccaaagaagaagcggaaagtctctgaggtggagtttcccacgag         | ggcagcctgcactgtggggtgttagacttctcttcttcttggct                         |

## References to Supplementary Material

1. Skipper, K.A., Nielsen, M.G., Andersen, S., Ryo, L.B., Bak, R.O. and Mikkelsen, J.G. (2018) Time-Restricted PiggyBac DNA Transposition by Transposase Protein Delivery Using Lentivirus-Derived Nanoparticles. *Mol Ther Nucleic Acids*, **11**, 253-262.
2. Cai, Y., Bak, R.O. and Mikkelsen, J.G. (2014) Targeted genome editing by lentiviral protein transduction of zinc-finger and TAL-effector nucleases. *Elife*, **3**, e01911.
